# Supplementary material for: Sulfoxidation with hydrogen peroxide catalyzed by [SeO4{WO(O2)2}2]2−
Source: Royal Society of Chemistry journal article supplement (doi:10.1039/c002318c), 2010-01-01
Supplement: c002318c.pdf [file c002318c.pdf]

*Electronic Supplementary Information*

*for*

**Sulfoxidation with Hydrogen Peroxide Catalyzed by  
[SeO<sub>4</sub>{WO(O<sub>2</sub>)<sub>2</sub>}<sub>2</sub>]<sup>2-</sup> and The Mechanism**

Keigo Kamata<sup>a,b</sup> Tomohisa Hirano,<sup>a</sup> Ryo Ishimoto,<sup>a</sup> and Noritaka Mizuno<sup>\*.a,b</sup>

<sup>a</sup>*Department of Applied Chemistry, School of Engineering, The University of Tokyo, 7-3-1 Hongo, Bunkyo-ku, Tokyo 113-8656, Japan. E-mail: tmizuno@mail.ecc.u-tokyo.ac.jp; Fax: +81 3 5841 7220; Tel: +81 3 5841 7272*

<sup>b</sup>*Core Research for Evolutional Science and Technology (CREST), Japan Science and Technology Agency (JST), 4-1-8 Honcho, Kawaguchi, Saitama 332-0012, Japan.*

**Synthesis and Characterization of [(n-C<sub>4</sub>H<sub>9</sub>)<sub>4</sub>N]<sub>2</sub>[SeO<sub>4</sub>{WO(O<sub>2</sub>)<sub>2</sub>}<sub>2</sub>] (I).** The tetra-*n*-butylammonium salt derivative of [SeO<sub>4</sub>{WO(O<sub>2</sub>)<sub>2</sub>}<sub>2</sub>]<sup>2-</sup> was synthesized according to the literature procedure.<sup>S1</sup> In 15% aqueous H<sub>2</sub>O<sub>2</sub> (9.25 mL, 42 mmol), H<sub>2</sub>WO<sub>4</sub> (1.75 g, 7 mmol) was suspended and the resulting suspension was stirred at 305 K for 30 min. The pale yellow solution was filtered to remove insoluble materials followed by addition of 80% H<sub>2</sub>SeO<sub>4</sub> (2.1 mL, 28 mmol). The solution was stirred at 273 K for 60 min and an excess amount of [(n-C<sub>4</sub>H<sub>9</sub>)<sub>4</sub>N](NO<sub>3</sub>) (3.05 g, 10 mmol) was added in a single step. The solution was stirred at 273 K for 30 min and the white precipitate (1.07 g) was collected by the filtration followed by the washing with an excess amount of H<sub>2</sub>O and diethyl ether. The precipitate was evacuated to dryness. A portion of the product (0.2 g) was dissolved in the acetonitrile solution (1 mL) containing a drop of H<sub>2</sub>O<sub>2</sub> at 298 K and the solution was cooled to 277 K. The colorless plate-like crystalline solid was obtained by vapor diffusion of diethyl ether into the acetonitrile solution. Yield: 0.11 g (55% based on the crude product). <sup>183</sup>W NMR (11.20 MHz, CD<sub>3</sub>CN, 298 K, Na<sub>2</sub>WO<sub>4</sub>): δ = -569.2 (Δν<sub>1/2</sub> = 3.9 Hz); <sup>77</sup>Se NMR (51.30 MHz, CD<sub>3</sub>CN, 298 K, (CH<sub>3</sub>)<sub>2</sub>Se): δ = 1168.9 (Δν<sub>1/2</sub> = 3.7 Hz); UV/Vis (CH<sub>3</sub>CN) □<sub>max</sub> (ε) 259 nm (1258 (mol of W)<sup>-1</sup>dm<sup>3</sup>cm<sup>-1</sup>); IR (KCl): 972, 915, 884, 864, 847, 831, 779, 739, 698, 654, 593, 576, 520, 463, 393, 371 cm<sup>-1</sup>; Raman: ν = 987, 974, 922, 884, 868, 838, 783, 599, 583, 542, 398, 336, 306, 264 cm<sup>-1</sup>; positive ion MS (CSI, CH<sub>3</sub>CN): *m/z*: 1398 [{(n-C<sub>4</sub>H<sub>9</sub>)<sub>4</sub>N]<sub>3</sub>SeO<sub>4</sub>{WO(O<sub>2</sub>)<sub>2</sub>}<sub>2</sub>]<sup>+</sup>; 2554 [{(n-C<sub>4</sub>H<sub>9</sub>)<sub>4</sub>N]<sub>5</sub>{SeO<sub>4</sub>{WO(O<sub>2</sub>)<sub>2</sub>}<sub>2</sub>}<sub>2</sub>]<sup>+</sup>; 3709 [{(n-C<sub>4</sub>H<sub>9</sub>)<sub>4</sub>N]<sub>7</sub>{SeO<sub>4</sub>{WO(O<sub>2</sub>)<sub>2</sub>}<sub>2</sub>}<sub>3</sub>]<sup>+</sup>; elemental analysis calcd (%) for C<sub>32</sub>H<sub>72</sub>N<sub>2</sub>O<sub>14</sub>SeW<sub>2</sub> [(n-C<sub>4</sub>H<sub>9</sub>)<sub>4</sub>N]<sub>2</sub>[SeO<sub>4</sub>{WO(O<sub>2</sub>)<sub>2</sub>}<sub>2</sub>]: C 33.26, H 6.28, N 2.42, Se 6.83, W 31.82; found: C 33.21, H 6.30, N 2.48, Se 6.53, W 31.21.

**Synthesis and Characterization of [(n-C<sub>6</sub>H<sub>13</sub>)<sub>4</sub>N]<sub>3</sub>[AsO<sub>4</sub>{WO(O<sub>2</sub>)<sub>2</sub>}<sub>4</sub>].** The tetra-*n*-hexylammonium salt derivative of [AsO<sub>4</sub>{WO(O<sub>2</sub>)<sub>2</sub>}<sub>4</sub>]<sup>3-</sup> was synthesized according to the literature procedure.<sup>S2</sup> Yield: 2.41 g (43%). <sup>183</sup>W NMR (11.20 MHz, CD<sub>3</sub>CN, 298 K,

Na<sub>2</sub>WO<sub>4</sub>):  $\delta = -567.5$  ( $\Delta\nu_{1/2} = 5.0$  Hz); UV/Vis (CH<sub>3</sub>CN)  $\lambda_{\max}$  ( $\epsilon$ ) 255.2 nm (1184 (mol of W)<sup>-1</sup>dm<sup>3</sup>cm<sup>-1</sup>); IR (KCl): 978, 917, 892, 876, 845, 756, 729, 647, 590, 574, 520, 485, 435 cm<sup>-1</sup>; Raman:  $\nu = 990, 924, 900, 862, 843, 653, 597, 580, 534, 386, 336, 328, 303, 232$  cm<sup>-1</sup>; positive ion MS (CSI, CH<sub>3</sub>CN):  $m/z$ : 2613 [ $\{(n\text{-C}_6\text{H}_{13})_4\text{N}\}_4\text{AsO}_4\{\text{WO}(\text{O}_2)_2\}_4\}^+$ ; elemental analysis calcd (%) for C<sub>72</sub>H<sub>156</sub>N<sub>3</sub>O<sub>24</sub>AsW<sub>4</sub> ( $[(n\text{-C}_6\text{H}_{13})_4\text{N}]_3[\text{AsO}_4\{\text{WO}(\text{O}_2)_2\}_4]$ ): C 38.29, H 6.96, N 1.86, As 3.32, W 32.56; found: C 38.06, H 6.99, N 1.80, As 3.13, W 32.39.

**Synthesis and Characterization of  $[(n\text{-C}_4\text{H}_9)_4\text{N}]_2[\text{SO}_4\{\text{WO}(\text{O}_2)_2\}_2]$ :** The tetra-*n*-butylammonium salt derivative of  $[\text{SO}_4\{\text{WO}(\text{O}_2)_2\}_2]^{2-}$  was synthesized according to the literature procedure.<sup>S3</sup> Yield: 1.39 g (54%). <sup>183</sup>W NMR (11.20 MHz, CD<sub>3</sub>CN, 298 K, Na<sub>2</sub>WO<sub>4</sub>):  $\delta = -587.2$  ( $\Delta\nu_{1/2} = 2.6$  Hz); UV/Vis (CH<sub>3</sub>CN)  $\lambda_{\max}$  ( $\epsilon$ ) 254.1 nm (1270 (mol of W)<sup>-1</sup>dm<sup>3</sup>cm<sup>-1</sup>); IR (KCl): 988, 974, 962, 922, 887, 858, 850, 739, 679, 655, 646, 599, 594, 575, 540, 526, 487 cm<sup>-1</sup>; Raman:  $\nu = 994, 970, 915, 883, 865, 806, 750, 662, 600, 582, 547, 409, 336, 311, 289, 266$  cm<sup>-1</sup>; positive ion MS (CSI, CH<sub>3</sub>CN):  $m/z$ : 1351 [ $\{(n\text{-C}_4\text{H}_9)_4\text{N}\}_3\text{SO}_4\{\text{WO}(\text{O}_2)_2\}_2\}^+$ ; elemental analysis calcd (%) for C<sub>32</sub>H<sub>72</sub>N<sub>2</sub>O<sub>14</sub>SW<sub>2</sub> ( $[(n\text{-C}_4\text{H}_9)_4\text{N}]_2[\text{SO}_4\{\text{WO}(\text{O}_2)_2\}_2]$ ): C 34.67, H 6.55, N 2.53, W 33.16; found: C 34.69, H 6.59, N 2.44, W 34.16.

**Synthesis and Characterization of  $[(n\text{-C}_6\text{H}_{13})_4\text{N}]_3[\text{PO}_4\{\text{WO}(\text{O}_2)_2\}_4]$ .** The tetra-*n*-hexylammonium salt derivative of  $[\text{PO}_4\{\text{WO}(\text{O}_2)_2\}_4]^{3-}$  was synthesized according to the literature procedure.<sup>S4</sup> Yield: 1.39 g (50%). <sup>31</sup>P NMR (109.25 MHz, CD<sub>3</sub>CN, 298 K, H<sub>3</sub>PO<sub>4</sub>):  $\delta = 4.5$  ( $^2J_{\text{W-P}} = 18.5$  Hz); <sup>183</sup>W NMR (11.20 MHz, CD<sub>3</sub>CN, 298 K, Na<sub>2</sub>WO<sub>4</sub>):  $\delta = -588.2$  ( $^2J_{\text{W-P}} = 18.4$  Hz,  $\Delta\nu_{1/2} = 7.3$  Hz); UV/Vis (CH<sub>3</sub>CN)  $\lambda_{\max}$  ( $\epsilon$ ) 254.2 nm (1268 (mol of W)<sup>-1</sup>dm<sup>3</sup>cm<sup>-1</sup>); IR (KCl): 977, 853, 843, 797, 757, 728, 660, 649, 603, 591, 573, 549, 525, 444 cm<sup>-1</sup>; Raman:  $\nu = 990, 864, 821, 655, 597, 580, 543, 391, 333, 305, 266, 237$  cm<sup>-1</sup>; positive ion MS (CSI, CH<sub>3</sub>CN):  $m/z$ : 2569 [ $\{(n\text{-C}_6\text{H}_{13})_4\text{N}\}_4\text{PO}_4\{\text{WO}(\text{O}_2)_2\}_4\}^+$ ; elemental analysis calcd (%) for C<sub>72</sub>H<sub>156</sub>N<sub>3</sub>O<sub>24</sub>PW<sub>4</sub> ( $[(n\text{-C}_6\text{H}_{13})_4\text{N}]_3[\text{PO}_4\{\text{WO}(\text{O}_2)_2\}_4]$ ): C 39.05, H 7.10, N 1.90, P 1.40, W 32.22; found: C 38.82, H 6.97, N 1.36, P 1.36, W 33.28.

**Synthesis and Characterization of  $[(n\text{-C}_4\text{H}_9)_4\text{N}]_2[\text{HAsO}_4\{\text{WO}(\text{O}_2)_2\}_2]$ .** The tetra-*n*-butylammonium salt derivative of  $[\text{HAsO}_4\{\text{WO}(\text{O}_2)_2\}_2]^{2-}$  was synthesized according to the literature procedure.<sup>S5</sup> Yield: 2.60 g (49%). <sup>183</sup>W NMR (11.20 MHz, CD<sub>3</sub>CN, 298 K, Na<sub>2</sub>WO<sub>4</sub>):  $\delta = -603.9$  ( $\Delta\nu_{1/2} = 5.0$  Hz); UV/Vis (CH<sub>3</sub>CN)  $\lambda_{\max}$  ( $\epsilon$ ) 252.1 nm (1330 (mol of W)<sup>-1</sup>dm<sup>3</sup>cm<sup>-1</sup>); IR (KCl):  $\nu = 968, 932, 871, 843, 814, 777, 739, 664, 584, 575, 569, 527, 512, 495, 457, 385, 366$  cm<sup>-1</sup>; Raman:  $\nu = 983, 914, 889, 859, 821, 651, 580, 531, 464, 391, 315, 264, 237$  cm<sup>-1</sup>; positive ion MS (CSI, CH<sub>3</sub>CN):  $m/z$ : 1395 [ $\{(n\text{-C}_4\text{H}_9)_4\text{N}\}_3\text{HAsO}_4\{\text{WO}(\text{O}_2)_2\}_2\}^+$ , 2548 [ $\{(n\text{-C}_4\text{H}_9)_4\text{N}\}_5\{\text{HAsO}_4\{\text{WO}(\text{O}_2)_2\}_2\}_2\}^+$ ; elemental analysis calcd (%) for C<sub>32</sub>H<sub>73</sub>N<sub>2</sub>O<sub>14</sub>AsW<sub>2</sub> ( $[(n\text{-C}_4\text{H}_9)_4\text{N}]_2[\text{HAsO}_4\{\text{WO}(\text{O}_2)_2\}_2]$ ): C 33.35, H 6.38, N 2.43, As 6.50, W 31.90; found: C 33.08 H 6.33, N 2.39, As 6.35, W 31.44.

**Synthesis and Characterization of  $[(n\text{-C}_4\text{H}_9)_4\text{N}]_2[\text{HPO}_4\{\text{WO}(\text{O}_2)_2\}_2]$ .** The tetra-*n*-butylammonium salt derivative of  $[\text{HPO}_4\{\text{WO}(\text{O}_2)_2\}_2]^{2-}$  was synthesized according to the literature procedure.<sup>S6</sup> Yield: 1.70 g (60%). <sup>31</sup>P NMR (109.25 MHz, CD<sub>3</sub>CN, 298 K, H<sub>3</sub>PO<sub>4</sub>):  $\delta = 2.8$  ( $^2J_{\text{W-P}} = 17.3$  Hz); <sup>183</sup>W NMR (11.20 MHz, CD<sub>3</sub>CN, 298 K, Na<sub>2</sub>WO<sub>4</sub>):  $\delta = -626.4$  ( $^2J_{\text{W-P}} = 17.1$  Hz,  $\Delta\nu_{1/2} = 5.8$  Hz); UV/Vis (CH<sub>3</sub>CN)  $\lambda_{\max}$  ( $\epsilon$ ) 251.5 nm (1294 (mol of W)<sup>-1</sup>dm<sup>3</sup>cm<sup>-1</sup>); IR (KCl): 1019, 996, 963, 882, 853, 843, 800, 737, 646, 625, 584, 569, 538, 487 cm<sup>-1</sup>; Raman:  $\nu = 977, 915, 887, 862, 807, 652, 582, 536, 335, 319, 300, 262, 239$  cm<sup>-1</sup>; positive ion MS (CSI, CH<sub>3</sub>CN):  $m/z$ : 1351 [ $(\text{TBA})_3\text{HPO}_4\{\text{WO}(\text{O}_2)_2\}_2\}^+$ ; elemental analysis calcd (%) for C<sub>32</sub>H<sub>73</sub>N<sub>2</sub>O<sub>14</sub>PW<sub>2</sub> ( $[(n\text{-C}_4\text{H}_9)_4\text{N}]_2[\text{HPO}_4\{\text{WO}(\text{O}_2)_2\}_2]$ ): C 34.67, H 6.64, N 2.53, P 2.79, W 33.17; found: C 34.50, H 6.54, N 2.33, P 2.75, W 33.48.

**Synthesis and Characterization of  $[(n\text{-C}_4\text{H}_9)_4\text{N}]_2[\text{Ph}_2\text{SiO}_2\{\text{WO}(\text{O}_2)_2\}_2]$ .** The tetra-*n*-butylammonium salt derivative of  $[\text{Ph}_2\text{SiO}_2\{\text{WO}(\text{O}_2)_2\}_2]^{2-}$  was synthesized by the modification of the reported method; tetraphenylphosphonium was replaced by

tetra-*n*-butylammonium.<sup>S7</sup> Yield: 1.70 g (40%). <sup>1</sup>H NMR (270 MHz, CD<sub>3</sub>CN, 298 K, TMS): δ = 7.77 (m, 4H, *m*-), 7.36 (m, 6H, *o*-, *p*-); <sup>13</sup>C NMR (67.80 MHz, ClCD<sub>2</sub>CD<sub>2</sub>Cl, 298 K, TMS): δ = 135.5, 130.0, 128.3; <sup>29</sup>Si NMR (53.45 MHz, CD<sub>3</sub>CN, 298 K, TMS): δ = -34.6 (<sup>2</sup>*J*<sub>Si-P</sub> = 2.9 Hz, Δ*v*<sub>1/2</sub> = 1.0 Hz); <sup>183</sup>W NMR (11.20 MHz, CD<sub>3</sub>CN, 298 K, Na<sub>2</sub>WO<sub>4</sub>): δ = -651.6 (Δ*v*<sub>1/2</sub> = 3.9 Hz); IR (KCl): ν = 974, 965, 933, 881, 850, 840, 746, 712, 701, 638, 582, 563, 505, 480, 437 cm<sup>-1</sup>; Raman: ν = 1006, 983, 940, 915, 886, 858, 646, 626, 588, 573, 531, 518, 403, 341, 325, 306, 262, 204 cm<sup>-1</sup>; positive ion MS (CSI, CH<sub>3</sub>CN): *m/z*: 1469 [ {(*n*-C<sub>4</sub>H<sub>9</sub>)<sub>4</sub>N}<sub>3</sub>PhSiO<sub>2</sub>{WO(O<sub>2</sub>)<sub>2</sub>}<sub>2</sub>]<sup>+</sup>; elemental analysis calcd (%) for C<sub>44</sub>H<sub>82</sub>N<sub>2</sub>O<sub>12</sub>SiW<sub>2</sub> [(*n*-C<sub>4</sub>H<sub>9</sub>)<sub>4</sub>N]<sub>2</sub>[Ph<sub>2</sub>SiO<sub>2</sub>{WO(O<sub>2</sub>)<sub>2</sub>}<sub>2</sub>]: C 43.07, H 6.74, N 2.28, Si 2.29, W 29.97; found: C 43.00, H 6.89, N 2.08, Si 2.00, W 27.28.

**Synthesis and Characterization of [(*n*-C<sub>4</sub>H<sub>9</sub>)<sub>4</sub>N]<sub>2</sub>{WO(O<sub>2</sub>)<sub>2</sub>}<sub>2</sub>(μ-O)].** The tetra-*n*-butylammonium salt derivative of [ {WO(O<sub>2</sub>)<sub>2</sub>}<sub>2</sub>(μ-O)]<sup>2-</sup> was synthesized according to the literature procedure.<sup>S8</sup> Yield: 0.2 g (12%). <sup>183</sup>W NMR (11.20 MHz, CD<sub>3</sub>CN, 298 K, Na<sub>2</sub>WO<sub>4</sub>): δ = -587.5 (Δ*v*<sub>1/2</sub> = 24.3 Hz); IR (KCl): ν = 962, 955, 848, 835, 655, 631, 615, 571, 554, 543, 524 cm<sup>-1</sup>; Raman: ν = 970, 961, 858, 844, 801, 786, 662, 624, 597, 572, 470, 328, 308, 275, 259 cm<sup>-1</sup>; positive ion MS (CSI, CH<sub>3</sub>CN): *m/z*: 1270.3 [ {(*n*-C<sub>4</sub>H<sub>9</sub>)<sub>4</sub>N}<sub>3</sub>{WO(O<sub>2</sub>)<sub>2</sub>}<sub>2</sub>(μ-O)]<sup>+</sup>; elemental analysis calcd (%) for C<sub>32</sub>H<sub>72</sub>N<sub>2</sub>O<sub>11</sub>W<sub>2</sub> [(*n*-C<sub>4</sub>H<sub>9</sub>)<sub>4</sub>N]<sub>2</sub>{WO(O<sub>2</sub>)<sub>2</sub>}<sub>2</sub>(μ-O)]: C 37.37, H 7.06, N 2.72, W 35.75; found: C 37.24, H 7.13, N 2.69, W 35.28.

**Kinetic Derivation.** The selenium-containing dinuclear peroxotungstate **I** reacts with a sulfide, leading to a sulfoxide and the subsequent peroxo species **II** (eqn (S1)):

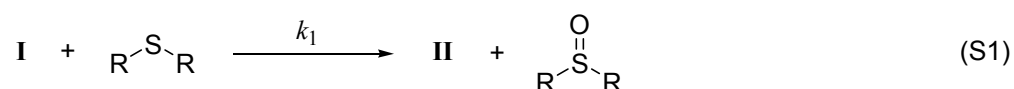

Then, **I** is regenerated by the reaction of **II** with an H<sub>2</sub>O<sub>2</sub> (eqn (S2)):

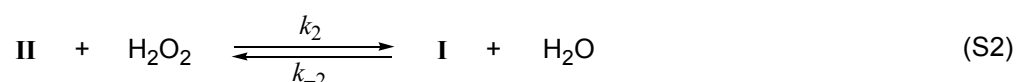

From the steady-state approximation on **I** and **II** (eqns (S3) and (S4)) and the mass balance (eqn (S5)), the rate of the formation of sulfoxide can be expressed by (eqn (S6)):

$$\frac{d[\text{I}]}{dt} = -k_1[\text{sulfide}][\text{I}] + k_2[\text{II}][\text{H}_2\text{O}_2] - k_{-2}[\text{I}][\text{H}_2\text{O}] = 0 \quad (\text{S3})$$

$$\frac{d[\text{II}]}{dt} = k_1[\text{sulfide}][\text{I}] - k_2[\text{II}][\text{H}_2\text{O}_2] + k_{-2}[\text{I}][\text{H}_2\text{O}] = 0 \quad (\text{S4})$$

$$[\text{I}]_t = [\text{I}] + [\text{II}] \quad (\text{S5})$$

$$R_0 = \frac{d[\text{sulfoxide}]}{dt} = \frac{k_1 k_2 [\text{I}]_t [\text{sulfide}] [\text{H}_2\text{O}_2]}{k_1 [\text{sulfide}] + k_2 [\text{H}_2\text{O}_2] + k_{-2} [\text{H}_2\text{O}]} \quad (\text{S6})$$

When the *k*<sub>1</sub>, *k*<sub>2</sub>, and *k*<sub>-2</sub> values in eqn (S6) are 9.3, 2.6, and 2.0 × 10<sup>-1</sup> M<sup>-1</sup>s<sup>-1</sup>, respectively, the experimental data in Figures 4 and 5 could be fitted with a simulation curve calculated using eqn (S6). All the kinetic data were fitted with the Igor Pro ver. 5.05 program.

### **Data of Products**

**Methyl phenyl sulfoxide:**  $^1\text{H}$  NMR (270 MHz,  $\text{CD}_3\text{CN}$ , 298 K, TMS):  $\delta$  = 2.64 (s, 3H), 7.51–7.55 (m, 3H), 7.61–7.64 (m, 2H);  $^{13}\text{C}\{^1\text{H}\}$  NMR (67.5 MHz,  $\text{CD}_3\text{CN}$ , 298 K, TMS):  $\delta$  = 44.2, 124.3, 130.1, 131.6, 147.6; MS (70 eV, EI):  $m/z$  (%): 140 (100) [ $M^+$ ], 125 (100), 124 (25), 109 (13), 97 (62), 94 (18), 91 (14), 78 (15), 77 (51), 65 (16), 51 (45), 50 (19), 45 (11).

**Methyl phenyl sulfone:**  $^1\text{H}$  NMR (270 MHz,  $\text{CD}_3\text{CN}$ , 298 K, TMS):  $\delta$  = 3.04 (s, 3H), 7.59–7.70 (m, 3H), 7.91–7.93 (m, 2H);  $^{13}\text{C}\{^1\text{H}\}$  NMR (67.5 MHz,  $\text{CD}_3\text{CN}$ , 298 K, TMS):  $\delta$  = 44.4, 128.0, 130.2, 134.5, 141.9; MS (70 eV, EI):  $m/z$  (%): 156 (36) [ $M^+$ ], 141 (33), 94 (42), 77 (100), 51 (28).

**Methyl *p*-methoxyphenyl sulfoxide:**  $^1\text{H}$  NMR (270 MHz,  $\text{CD}_3\text{CN}$ , 298 K, TMS):  $\delta$  = 2.63 (s, 3H), 3.82 (s, 3H), 7.04–7.09 (m, 2H), 7.55–7.60 (m, 2H);  $^{13}\text{C}\{^1\text{H}\}$  NMR (67.5 MHz,  $\text{CD}_3\text{CN}$ , 298 K, TMS):  $\delta$  = 50.0, 58.7, 121.0, 129.2, 139.3, 165.3; MS (70 eV, EI):  $m/z$  (%): 170 (21) [ $M^+$ ], 155 (100), 154 (12), 139 (16), 123 (11).

**Methyl *p*-methylphenyl sulfoxide:**  $^1\text{H}$  NMR (270 MHz,  $\text{CD}_3\text{CN}$ , 298 K, TMS):  $\delta$  = 2.36 (s, 3H), 2.62 (s, 3H), 7.32–7.35 (m, 2H), 7.48–7.52 (m, 2H);  $^{13}\text{C}\{^1\text{H}\}$  NMR (67.5 MHz,  $\text{CD}_3\text{CN}$ , 298 K, TMS):  $\delta$  = 21.0, 43.4, 124.3, 130.6, 142.4, 124.8; MS (70 eV, EI):  $m/z$  (%): 154 (66) [ $M^+$ ], 139 (100), 138 (19), 111 (12), 91 (36), 77 (28), 67 (13), 65 (20), 63 (11).

***p*-Fluorophenyl methyl sulfoxide:**  $^1\text{H}$  NMR (270 MHz,  $\text{CD}_3\text{CN}$ , 298 K, TMS):  $\delta$  = 2.66 (s, 3H), 7.23–7.33 (m, 2H), 7.65–7.71 (m, 2H); MS (70 eV, EI):  $m/z$  (%): 158 (58) [ $M^+$ ], 143 (100), 142 (18), 127 (16), 115 (41), 112 (14), 95 (27), 83 (19), 75 (23).

***p*-Chlorophenyl methyl sulfoxide:**  $^1\text{H}$  NMR (270 MHz,  $\text{CD}_3\text{CN}$ , 298 K, TMS):  $\delta$  = 2.64 (s, 3H), 7.48–7.52 (m, 2H), 7.55–7.60 (m, 2H);  $^{13}\text{C}\{^1\text{H}\}$  NMR (67.5 MHz,  $\text{CD}_3\text{CN}$ , 298 K, TMS):  $\delta$  = 43.5, 126.1, 130.1, 137.1, 144.9; MS (70 eV, EI):  $m/z$  (%): 176 (17), 175 (11), 174 (48) [ $M^+$ ], 161 (34), 160 (28), 159 (100), 158 (54), 145 (12), 143 (39), 131 (36), 128 (18), 127 (12), 125 (12), 112 (15), 111 (22), 108 (32), 76 (11), 75 (35), 74 (17), 69 (14), 63 (11), 50 (24), 45 (32).

***p*-Bromophenyl methyl sulfoxide:**  $^1\text{H}$  NMR (270 MHz,  $\text{CD}_3\text{CN}$ , 298 K, TMS):  $\delta$  = 2.63 (s, 3H), 7.48–7.53 (m, 2H), 7.63–7.68 (m, 2H);  $^{13}\text{C}\{^1\text{H}\}$  NMR (67.5 MHz,  $\text{CD}_3\text{CN}$ , 298 K, TMS):  $\delta$  = 43.4, 125.4, 126.3, 133.0, 145.5; MS (70 eV, EI):  $m/z$  (%): 281 (19), 220 (62) [ $M^+$ ], 218 (67), 205 (98), 204 (100), 203 (92), 202 (77), 189 (28), 187 (28), 177 (26), 175 (20), 171 (24), 131 (23), 122 (20), 108 (72), 96 (46), 86 (11), 82 (21), 77 (29), 76 (47), 75 (27), 74 (34), 69 (25), 63 (23), 59 (10), 58 (18), 56 (21), 51 (28), 50 (56), 45 (14), 43 (15).

**4-(Methylsulfinyl)-acetophenone:**  $^1\text{H}$  NMR (270 MHz,  $\text{CD}_3\text{CN}$ , 298 K, TMS):  $\delta$  = 2.57 (s, 3H), 2.70 (s, 3H), 7.69–7.73 (m, 2H), 8.05–8.08 (m, 2H);  $^{13}\text{C}\{^1\text{H}\}$  NMR (67.5 MHz,  $\text{CD}_3\text{CN}$ , 298 K, TMS):  $\delta$  = 26.8, 43.2, 124.5, 129.6, 139.5, 151.1, 198.7; MS (70 eV, EI):  $m/z$  (%): 182, (63) [ $M^+$ ], 168 (10), 167 (100), 152 (73), 151 (12), 139 (22), 124 (12), 121 (13), 76 (12), 50 (13).

**4-Methyl sulfinyl benzonitrile:**  $^1\text{H}$  NMR (270 MHz,  $\text{CD}_3\text{CN}$ , 298 K, TMS):  $\delta$  = 2.68 (s, 3H), 7.52–7.59 (m, 2H), 7.81–7.86 (m, 2H);  $^{13}\text{C}\{^1\text{H}\}$  NMR (67.5 MHz,  $\text{CD}_3\text{CN}$ , 298 K, TMS):  $\delta$  = 43.1, 114.5, 118.5, 125.0, 133.7, 151.7; MS (70 eV, EI):  $m/z$  (%): 165 (89) [ $M^+$ ], 150 (100), 149 (24), 122 (60), 119 (18), 116 (13), 102 (29), 90 (11), 76 (16), 75 (26), 51 (14), 50 (13), 45 (10).

***p*-Nitrophenyl methyl sulfoxides:**  $^1\text{H}$  NMR (270 MHz,  $\text{CD}_3\text{CN}$ , 298 K, TMS):  $\delta$  = 2.73 (s, 3H), 7.84 (d,  $J$  = 8.1 Hz, 2H), 8.34 (d,  $J$  = 7.7 Hz, 2H);  $^{13}\text{C}\{^1\text{H}\}$  NMR (67.5 MHz,  $\text{CD}_3\text{CN}$ , 298 K, TMS):  $\delta$  = 43.8, 125.1, 125.8, 150.1, 152.8, 150.3, 154.5; MS (70 eV, EI):  $m/z$  (%): 185 (100) [ $M^+$ ], 170 (45), 140 (22), 124 (12), 112 (14), 96 (10), 92 (10), 84 (10), 76 (17), 75 (11), 63 (14).

**Ethyl phenyl sulfoxide:**  $^1\text{H}$  NMR (270 MHz,  $\text{CD}_3\text{CN}$ , 298 K, TMS):  $\delta$  = 1.08 (t,  $J$  = 7.3 Hz, 3H), 2.66–2.97 (m, 2H), 7.51–7.62 (m, 5H);  $^{13}\text{C}\{^1\text{H}\}$  NMR (67.5 MHz,  $\text{CD}_3\text{CN}$ , 298 K, TMS):  $\delta$  = 5.8, 50.1, 124.8, 130.0, 131.7, 143.5; MS (70 eV, EI):  $m/z$  (%): 154 (26) [ $M^+$ ], 126 (64), 125 (17), 97 (12), 78 (100), 77 (21), 51 (22).

**Benzyl methyl sulfoxide:**  $^1\text{H}$  NMR (270 MHz,  $\text{CD}_3\text{CN}$ , 298 K, TMS):  $\delta$  2.40 (t,  $J$  = 7.3 Hz, 3H), 3.8–4.0 (m, 2H), 7.2–7.4 (m, 5H);  $^{13}\text{C}\{^1\text{H}\}$  NMR (67.5 MHz,  $\text{CD}_3\text{CN}$ , 298 K, TMS):  $\delta$  = 37.3, 59.4, 128.7, 129.2, 130.8, 131.3; MS (70 eV, EI):  $m/z$  (%): 154 (1) [ $M^+$ ], 106 (1), 105 (2), 92 (8), 91 (100), 89 (2), 78 (1), 77 (7), 65 (10), 63 (2), 51 (5).

**Diphenyl sulfoxide:**  $^1\text{H}$  NMR (270 MHz,  $\text{CD}_3\text{CN}$ , 298 K, TMS):  $\delta$  = 7.43–7.53 (m, 6H), 7.65–7.65 (m, 4H);  $^{13}\text{C}\{^1\text{H}\}$  NMR (67.5 MHz,  $\text{CD}_3\text{CN}$ , 298 K, TMS):  $\delta$  = 125.1, 130.3, 132.0, 147.3; MS (70 eV, EI):  $m/z$  (%): 203 (15) [ $M^+ + 1$ ], 202 (100) [ $M^+$ ], 186 (14), 185 (22), 174 (15), 173 (21), 155 (11), 154 (83), 153 (23), 152 (12), 141 (13), 125 (11), 109 (84), 97 (36), 77 (48), 65 (33).

**Diphenyl sulfone:**  $^1\text{H}$  NMR (270 MHz,  $\text{CD}_3\text{CN}$ , 298 K, TMS):  $\delta$  = 7.54–7.65 (m, 6H), 7.93–7.95 (m, 4H);  $^{13}\text{C}\{^1\text{H}\}$  NMR (67.5 MHz,  $\text{CD}_3\text{CN}$ , 298 K, TMS):  $\delta$  = 128.3, 130.5, 134.4, 142.5; MS (70 eV, EI):  $m/z$  (%): 218 (28) [ $M^+$ ], 153 (4), 152 (6), 127 (5), 126 (8), 125 (100), 97 (17), 77 (35), 51 (25).

**Methyl *n*-octyl sulfoxide:**  $^1\text{H}$  NMR (270 MHz,  $\text{CD}_3\text{CN}$ , 298 K, TMS):  $\delta$  = 0.97 (t,  $J$  = 7.3 Hz, 3H), 1.60–1.69 (m, 12H), 2.40 (s, 3H), 2.61–2.68 (m, 2H);  $^{13}\text{C}\{^1\text{H}\}$  NMR (67.5 MHz,  $\text{CD}_3\text{CN}$ , 298 K, TMS):  $\delta$  = 14.1, 22.9, 23.0, 29.0, 29.4, 29.5, 32.2, 38.1, 52.3; MS (70 eV, EI):  $m/z$  (%): 177 (10) [ $M^+ + 1$ ], 112 (11), 107 (17), 94 (13), 91 (13), 85 (11), 84 (17), 83 (27), 82 (13), 81 (100), 80 (25), 79 (11), 77 (10), 71 (41), 70 (20), 69 (24), 57 (63), 56 (29), 55 (30), 53 (10), 43 (48), 42 (10), 41 (50).

**Methyl *n*-octyl sulfone:**  $^1\text{H}$  NMR (270 MHz,  $\text{CD}_3\text{CN}$ , 298 K, TMS):  $\delta$  = 0.86 (t,  $J$  = 5.9 Hz, 3H), 1.27–1.78 (m, 12H), 2.83 (s, 3H), 2.96–3.02 (m, 2H);  $^{13}\text{C}\{^1\text{H}\}$  NMR (67.5 MHz,  $\text{CD}_3\text{CN}$ , 298 K, TMS):  $\delta$  = 14.1, 22.9, 23.0, 28.7, 29.4, 29.5, 32.2, 40.5, 54.8; MS (70 eV, EI):  $m/z$  (%): 193 (3) [ $M^+ + 1$ ], 177 (6), 175 (4), 112 (11), 107 (11), 84 (12), 83 (21), 81 (100), 80 (24), 71 (49), 70 (17), 69 (21), 57 (64), 56 (23), 55 (34).

**Ethyl *n*-propyl sulfoxide:**  $^1\text{H}$  NMR (270 MHz,  $\text{CD}_3\text{CN}$ , 298 K, TMS):  $\delta$  = 1.03 (t,  $J$  = 7.4 Hz, 3H), 1.22 (t,  $J$  = 7.5 Hz, 3H), 1.63–1.78 (m, 2H), 2.56–2.74 (m, 4H);  $^{13}\text{C}\{^1\text{H}\}$  NMR (67.5 MHz,  $\text{CD}_3\text{CN}$ , 298 K, TMS):  $\delta$  = 6.7, 13.2, 16.6, 45.4, 53.2; MS (70 eV, EI):  $m/z$  (%): 120 (43) [ $M^+$ ], 103 (13), 78 (100), 77 (12), 63 (51), 50 (21), 43 (82), 41 (58).

**Diallyl sulfoxide:**  $^1\text{H}$  NMR (270 MHz,  $\text{CD}_3\text{CN}$ , 298 K, TMS):  $\delta$  = 3.32–3.54 (m, 4H), 5.31–5.40 (m, 4H), 5.77–5.92 (m, 2H);  $^{13}\text{C}\{^1\text{H}\}$  NMR (67.5 MHz,  $\text{CD}_3\text{CN}$ , 298 K, TMS):  $\delta$  = 54.6, 123.6, 127.1; MS (70 eV, EI):  $m/z$  (%): 130 (16) [ $M^+$ ], 113 (5), 100 (12), 89 (8), 82 (16), 81 (100), 80 (23), 79 (14), 73 (12), 68 (33), 67 (12).

**Diallyl sulfones:**  $^1\text{H}$  NMR (270 MHz,  $\text{CD}_3\text{CN}$ , 298 K, TMS):  $\delta$  = 3.74 (d,  $J$  = 7.0 Hz 2H), 5.39–5.47 (m, 2H), 5.79–5.95 (m, 1H);  $^{13}\text{C}\{^1\text{H}\}$  NMR (67.5 MHz,  $\text{CD}_3\text{CN}$ , 298 K, TMS):  $\delta$  = 56.6, 124.9, 125.8; MS (70 eV, EI):  $m/z$  (%): 146 (0.1) [ $M^+$ ], 105 (6), 97(2), 82 (2), 81 (20), 79 (2), 68 (6), 67 (100), 54 (49).

**Di(2-hydroxyethyl) sulfoxide:**  $^1\text{H}$  NMR (270 MHz,  $\text{CD}_3\text{CN}$ , 298 K, TMS):  $\delta$  = 2.93–3.09 (m, 2H), 3.89 (t,  $J$  = 4.9 Hz);  $^{13}\text{C}\{^1\text{H}\}$  NMR (67.5 MHz,  $\text{CD}_3\text{CN}$ , 298 K, TMS):  $\delta$  = 55.2, 123.4, 127.7; MS (70 eV, EI):  $m/z$  (%): 138 (3) [ $M^+$ ], 104 (3), 96 (4), 94 (70), 91 (3), 76 (100), 63 (44), 61 (14).

**Phenyl vinyl sulfoxide:**  $^1\text{H}$  NMR (270 MHz,  $\text{CD}_3\text{CN}$ , 298 K, TMS):  $\delta$  = 5.83 (d,  $J$  = 4.7 Hz, 1H), 6.09 (d,  $J$  = 8.1 Hz, 1H), 6.73 (d,  $J$  = 4.9, 8.2 Hz, 1H), 7.36–7.62 (m, 5H);  $^{13}\text{C}\{^1\text{H}\}$  NMR (67.5 MHz,  $\text{CD}_3\text{CN}$ , 298 K, TMS):  $\delta$  = 120.7, 125.2, 130.4, 132.0, 144.3, 144.7; MS (70 eV,

EI):  $m/z$  (%): 152 (19) [ $M^+$ ], 136 (8), 124 (13), 123 (16), 109 (31), 104 (100), 97 (14), 91 (11), 78 (42), 77 (31), 65 (15), 51 (32), 50 (11).

**Phenyl vinyl sulfone:**  $^1\text{H}$  NMR (270 MHz,  $\text{CD}_3\text{CN}$ , 298 K, TMS):  $\delta$  = 6.10 (d,  $J$  = 5.0 Hz, 1H), 6.37 (d,  $J$  = 8.2 Hz, 1H), 6.80 (d,  $J$  = 5.0, 8.2 Hz, 1H), 7.62–7.73 (m, 2H), 7.85–7.89 (m, 3H);  $^{13}\text{C}\{^1\text{H}\}$  NMR (67.5 MHz,  $\text{CD}_3\text{CN}$ , 298 K, TMS):  $\delta$  = 128.3, 129.0, 130.3, 134.6, 139.2, 140.5; MS (70 eV, EI):  $m/z$  (%): 168 (21) [ $M^+$ ], 125 (100), 97 (13), 78 (11), 77 (100), 65 (12), 51 (35).

**Tetrahydrothiophene sulfoxide:**  $^1\text{H}$  NMR (270 MHz,  $\text{CD}_3\text{CN}$ , 298 K, TMS):  $\delta$  = 1.91–2.22 (m, 4H), 2.7–2.90 (m, 4H);  $^{13}\text{C}\{^1\text{H}\}$  NMR (67.5 MHz,  $\text{CD}_3\text{CN}$ , 298 K, TMS):  $\delta$  = 25.9, 54.9; MS (70 eV, EI):  $m/z$  (%): 104 (61) [ $M^+$ ], 87 (5), 76 (3), 63 (29), 60 (4), 59 (4), 56 (7), 55 (100).

**2-Mehyltetrahydrothiophene 1-oxide:**  $^{13}\text{C}\{^1\text{H}\}$  NMR (67.5 MHz,  $\text{CD}_3\text{CN}$ , 298 K, TMS): *cis*-isomer:  $\delta$  = 11.6, 25.3, 32.9, 55.3, 58.9; *trans*-isomer:  $\delta$  = 15.0, 25.2, 34.5, 53.0, 65.1; MS (70 eV, EI):  $m/z$  (%): 118 (83) [ $M^+$ ], 101, (19), 87 (8), 69 (100), 68 (24), 67 (23), 63 (74), 59 (12), 56 (30), 55 (32).

**Tetrahydrothiopyran 1-oxide:**  $^1\text{H}$  NMR (270 MHz,  $\text{CD}_3\text{CN}$ , 298 K, TMS):  $\delta$  = 1.48–1.66 (m, 4 H), 2.00–2.17 (m, 2 H), 2.60–2.87 (m, 4 H);  $^{13}\text{C}\{^1\text{H}\}$  NMR (67.5 MHz,  $\text{CD}_3\text{CN}$ , 298 K, TMS):  $\delta$  = 19.4, 25.0, 52.4; MS (70 eV, EI):  $m/z$  (%): 118 (77) [ $M^+$ ], 101 (24), 90 (19), 69 (100), 68 (22), 67 (22), 63 (68), 56 (21), 55 (32).

**Dibenzothiophene 5,5-dioxide:**  $^1\text{H}$  NMR (270 MHz,  $\text{CDCl}_3$ , 298 K, TMS):  $\delta$  = 7.81 (d, 2H,  $J$  = 8.1 Hz), 7.78 (d, 2H,  $J$  = 8.9 Hz), 7.62 (dt, 2H,  $J$  = 7.4 and 0.8 Hz), 7.51 (dt, 2H,  $J$  = 7.6 and 0.5 Hz);  $^{13}\text{C}\{^1\text{H}\}$  NMR (67.5 MHz,  $\text{CDCl}_3$ , 298 K, TMS):  $\delta$  = 122.1, 122.7, 130.9, 132.1, 134.4, 138.3; MS (70 eV, EI):  $m/z$  (%): 217 (15), 216 (100), 188 (10), 187 (36), 171 (13), 168 (32), 160 (27), 150 (14), 144 (17), 139 (25), 136 (31), 115 (18), 104 (15), 79 (16), 75 (10), 63 (12).

**1,4-Oxathiane 4-oxide:**  $^1\text{H}$  NMR (270 MHz,  $\text{CD}_3\text{CN}$ , 298 K, TMS):  $\delta$  = 2.51–2.65 (m, 2H), 2.88–2.98 (m, 2H), 3.68–3.76 (m, 2H), 4.15–4.24 (m, 2H);  $^{13}\text{C}\{^1\text{H}\}$  NMR (67.5 MHz,  $\text{CD}_3\text{CN}$ , 298 K, TMS):  $\delta$  = 59.9, 47.0; MS (70 eV, EI):  $m/z$  (%): 120 (40) [ $M^+$ ], 104 (2), 94 (5), 93 (3), 92 (100), 77 (27), 76 (21), 63 (15), 62 (5), 61 (4), 60 (3), 59 (24), 58 (3), 57 (3), 50 (8).

**1,3-Dithiolane 1-oxide:**  $^1\text{H}$  NMR (270 MHz,  $\text{CD}_3\text{CN}$ , 298 K, TMS):  $\delta$  = 2.75–2.81 (m, 1H), 3.35–3.45 (m, 2H), 3.69–3.92 (m, 3H);  $^{13}\text{C}\{^1\text{H}\}$  NMR (67.5 MHz,  $\text{CD}_3\text{CN}$ , 298 K, TMS):  $\delta$  = 55.4, 57.5, 78.9; MS (70 eV, EI):  $m/z$  (%): 124 (10), 123 (6), 122 (100) [ $M^+$ ], 94 (8), 78 (8), 77 (5), 76 (11), 74 (6), 73 (29), 63 (8), 60 (33), 59 (17), 58 (5).

**1,3-Dithiane 1-oxide:**  $^1\text{H}$  NMR (270 MHz,  $\text{CD}_3\text{CN}$ , 298 K, TMS):  $\delta$  = 2.00–2.14 (m, 1H), 2.40–2.67 (m, 4H), 3.16–3.25 (m, 1H), 3.64 (d,  $J$  = 12.7 Hz, 1H), 3.97 (d,  $J$  = 12.7 Hz, 1H);  $^{13}\text{C}\{^1\text{H}\}$  NMR (67.5 MHz,  $\text{CD}_3\text{CN}$ , 298 K, TMS):  $\delta$  = 52.8, 50.1, 28.3, 27.4; MS (70 eV, EI):  $m/z$  (%): 138 (9), 137 (8), 136 (100) [ $M^+$ ], 119 (12), 106 (25), 90 (50), 89 (6), 87 (50), 74 (11), 73 (39), 72 (8), 63 (9), 62 (5), 61 (31), 60 (27), 59 (14), 57 (5).

**Thianthrene 5-oxide (SSO):**  $^1\text{H}$  NMR (270 MHz,  $\text{CDCl}_3$ , 298 K, TMS):  $\delta$  7.44 (dt, 2H,  $J$  = 1.2, 7.6 Hz), 7.54 (dt, 2H,  $J$  = 1.2, 7.6 Hz), 7.62 (dd, 2H,  $J$  = 1.2, 7.6 Hz), 7.92 (dd, 2H,  $J$  = 1.2, 7.6 Hz);  $^{13}\text{C}\{^1\text{H}\}$  NMR (67.5 MHz,  $\text{CDCl}_3$ , 298 K, TMS):  $\delta$  = 124.3, 128.2, 128.8, 129.7, 141.2; elemental analysis calcd (%) for  $\text{C}_{12}\text{H}_8\text{OS}_2$ : C 62.04, H 3.47; found: C 61.92, H 3.65.

**Thianthrene 5,5-dioxide (SSO<sub>2</sub>):**  $^1\text{H}$  NMR (270 MHz,  $\text{CDCl}_3$ , 298 K, TMS):  $\delta$  = 7.50–7.59 (m, 4H), 7.63–7.68 (m, 2H), 8.19–8.25 (m, 2H);  $^{13}\text{C}\{^1\text{H}\}$  NMR (67.5 MHz,  $\text{CDCl}_3$ , 298 K, TMS):  $\delta$  = 125.5, 127.7, 128.7, 132.0, 135.1, 135.3.

***cis*-Thianthrene 5,10-dioxide (*cis*-SOSO):**  $^1\text{H}$  NMR (270 MHz,  $\text{CDCl}_3$ , 298 K, TMS):  $\delta$  = 7.69–7.76 (m, 4H), 8.04–8.11 (m, 4H);  $^{13}\text{C}\{^1\text{H}\}$  NMR (67.5 MHz,  $\text{CDCl}_3$ , 298 K, TMS):  $\delta$  = 123.7, 130.8, 138.4.

**trans-Thianthrene 5,10-dioxide (trans-SOSO):**  $^1\text{H}$  NMR (270 MHz,  $\text{CDCl}_3$ , 298 K, TMS):  $\delta = 7.63\text{--}7.70$  (m, 4H),  $8.08\text{--}8.14$  (m, 4H);  $^{13}\text{C}$   $\{^1\text{H}\}$  NMR (67.5 MHz,  $\text{CDCl}_3$ , 298 K, TMS):  $\delta = 127.8, 131.4, 142.8$ .

**Thianthrene 5,5,10-trioxide (SOSO<sub>2</sub>):**  $^1\text{H}$  NMR (270 MHz,  $\text{CDCl}_3$ , 298 K, TMS):  $\delta = 7.67\text{--}7.73$  (m, 2H),  $7.73\text{--}7.84$  (m, 2H),  $8.12\text{--}8.21$  (m, 4H);  $^{13}\text{C}$   $\{^1\text{H}\}$  NMR (67.5 MHz,  $\text{CDCl}_3$ , 298 K, TMS):  $\delta = 125.0, 126.1, 130.7, 133.0, 134.1, 147.8$ .

## References

- S1 K. Kamata, T. Hirano, S. Kuzuya and N. Mizuno, *J. Am. Chem. Soc.*, 2009, **131**, 6997; K. Kamata, T. Hirano and N. Mizuno, *Chem. Commun.*, 2009, 3958; K. Kamata, R. Ishimoto, T. Hirano, S. Kuzuya, K. Uehara and N. Mizuno, *Inorg. Chem.*, 2010, **49**, 2471.
- S2 J.-Y. Piquemal, L. Salles, G. Chottard, P. Herson, C. Ahcine, J.-M. Brégeault, *Eur. J. Inorg. Chem.*, 2006, 939.
- S3 J.-Y. Piquemal, L. Salles, C. Bois, F. Robert, J.-M. Brégeault, *C. R. Acad. Sci., Série II*, 1994, 1481.
- S4 C. Venturello, R. D'Aloisio, J. C. J. Bart, M. Ricci, *J. Mol. Catal.*, 1985, **32**, 107.
- S5 L. Salles, F. Robert, V. Semmer, Y. Jeannin, J.-M. Brégeault, *Bull. Soc. Chim. Fr.*, 1996, **133**, 319.
- S6 L. Salles, C. Aubry, R. Thouvenot, F. Robert, C. Dorémieux-Morin, G. Chottard, H. Ledon, Y. Jeannin, J.-M. Brégeault, *Inorg. Chem.*, 1994, **33**, 871.
- S7 J.-Y. Piquemal, C. Bois, J.-M. Brégeault, *Chem. Commun.*, 1997, 473.
- S8 K. Kamata, S. Kuzuya, K. Uehara, S. Yamaguchi, N. Mizuno, *Inorg. Chem.*, 2007, **46**, 3768.

**Table S1** Effect of catalysts on oxidation of thioanisole with H<sub>2</sub>O<sub>2</sub><sup>a</sup>

| entry           | catalyst                                                                                                | yield (%) | selectivity (%) |         | <i>R</i> <sub>0</sub> (mM min <sup>-1</sup> ) |
|-----------------|---------------------------------------------------------------------------------------------------------|-----------|-----------------|---------|-----------------------------------------------|
|                 |                                                                                                         |           | sulfoxide       | sulfone |                                               |
| 1               | <b>I</b>                                                                                                | 90        | 95              | 5       | 25.0                                          |
| 2               | without                                                                                                 | <1        | –               | –       | –                                             |
| 3 <sup>b</sup>  | H <sub>2</sub> SeO <sub>4</sub>                                                                         | 1         | 99              | 1       | <0.1                                          |
| 4 <sup>c</sup>  | SeO <sub>2</sub>                                                                                        | 12        | 93              | 7       | 0.4                                           |
| 5               | H <sub>2</sub> WO <sub>4</sub>                                                                          | 1         | 44              | 56      | <0.1                                          |
| 6               | H <sub>2</sub> SeO <sub>4</sub> + H <sub>2</sub> WO <sub>4</sub>                                        | 4         | 92              | 8       | 0.2                                           |
| 7               | (TBA) <sub>2</sub> [{WO(O <sub>2</sub> ) <sub>2</sub> } <sub>2</sub> (μ-O)]                             | 45        | 87              | 13      | 3.1                                           |
| 8               | (TBA) <sub>2</sub> [SO <sub>4</sub> {WO(O <sub>2</sub> ) <sub>2</sub> } <sub>2</sub> ]                  | 73        | 92              | 8       | 16.0                                          |
| 9 <sup>d</sup>  | (THA) <sub>3</sub> [AsO <sub>4</sub> {WO(O <sub>2</sub> ) <sub>2</sub> } <sub>4</sub> ]                 | 83        | 92              | 8       | 15.8                                          |
| 10 <sup>d</sup> | (THA) <sub>3</sub> [PO <sub>4</sub> {WO(O <sub>2</sub> ) <sub>2</sub> } <sub>4</sub> ]                  | 61        | 92              | 8       | 7.7                                           |
| 11              | (TBA) <sub>2</sub> [HAsO <sub>4</sub> {WO(O <sub>2</sub> ) <sub>2</sub> } <sub>2</sub> ]                | 61        | 87              | 13      | 4.1                                           |
| 12              | (TBA) <sub>2</sub> [HPO <sub>4</sub> {WO(O <sub>2</sub> ) <sub>2</sub> } <sub>2</sub> ]                 | 52        | 89              | 11      | 3.7                                           |
| 13              | (TBA) <sub>2</sub> [Ph <sub>2</sub> SiO <sub>2</sub> {WO(O <sub>2</sub> ) <sub>2</sub> } <sub>2</sub> ] | 11        | 86              | 14      | 0.5                                           |

<sup>a</sup> Reaction conditions: Catalyst (W: 0.2 mol% relative to thioanisole and H<sub>2</sub>O<sub>2</sub>), thioanisole (1 mmol), 30% aqueous H<sub>2</sub>O<sub>2</sub> (1 mmol), CH<sub>3</sub>CN (6 mL), 293 K, 30 min. Yield was determined by GC. *R*<sub>0</sub> values were determined from the reaction profiles at low conversions (≤20%) of both thioanisole and H<sub>2</sub>O<sub>2</sub>. <sup>b</sup> H<sub>2</sub>SeO<sub>4</sub> (0.1 mol%). <sup>c</sup> SeO<sub>2</sub> (0.1 mol%). <sup>d</sup> THA = [(*n*-C<sub>6</sub>H<sub>13</sub>)<sub>4</sub>N]<sup>+</sup>.



**Table S2** Oxidation of various acyclic sulfides with 30% aqueous H<sub>2</sub>O<sub>2</sub> catalyzed by **I**<sup>a</sup>

$$\begin{array}{c}
 \text{R}_1-\text{S}-\text{R}_2 + \text{H}_2\text{O}_2 \xrightarrow[\text{CH}_3\text{CN, 293 K}]{\text{I}} \text{R}_1-\overset{\text{O}}{\parallel}{\text{S}}-\text{R}_2 + \text{H}_2\text{O}
 \end{array}$$

| entry           | substrate                                        |                                 | time (min) | yield (%) | selectivity to sulfoxide(%) | H <sub>2</sub> O <sub>2</sub> efficiency (%) |
|-----------------|--------------------------------------------------|---------------------------------|------------|-----------|-----------------------------|----------------------------------------------|
|                 | R <sub>1</sub>                                   | R <sub>2</sub>                  |            |           |                             |                                              |
| 1               | Ph                                               | Me                              | 120        | 99        | 90                          | 99                                           |
| 2 <sup>b</sup>  | Ph                                               | Me                              | 240        | 98        | 95                          | 98                                           |
| 3               | 4-CH <sub>3</sub> OC <sub>6</sub> H <sub>4</sub> | Me                              | 120        | >99       | 90                          | >99                                          |
| 4               | 4-CH <sub>3</sub> C <sub>6</sub> H <sub>4</sub>  | Me                              | 120        | 98        | 93                          | 98                                           |
| 5               | 4-FC <sub>6</sub> H <sub>4</sub>                 | Me                              | 120        | >99       | 88                          | >99                                          |
| 6               | 4-ClC <sub>6</sub> H <sub>4</sub>                | Me                              | 120        | 99        | 87                          | 99                                           |
| 7               | 4-BrC <sub>6</sub> H <sub>4</sub>                | Me                              | 120        | 99        | 87                          | 99                                           |
| 8               | 4-COMeC <sub>6</sub> H <sub>4</sub>              | Me                              | 120        | 99        | 85                          | 99                                           |
| 9               | 4-CNC <sub>6</sub> H <sub>4</sub>                | Me                              | 200        | >99       | 81                          | >99                                          |
| 10              | 4-NO <sub>2</sub> C <sub>6</sub> H <sub>4</sub>  | Me                              | 210        | >99       | 78                          | >99                                          |
| 11 <sup>b</sup> | 4-NO <sub>2</sub> C <sub>6</sub> H <sub>4</sub>  | Me                              | 800        | 96        | 99                          | 96                                           |
| 12              | Ph                                               | Et                              | 100        | >99       | 82                          | >99                                          |
| 13 <sup>b</sup> | Ph                                               | Et                              | 100        | 98        | 96                          | 98                                           |
| 14              | Bn                                               | Me                              | 120        | >99       | 94                          | >99                                          |
| 15              | Ph                                               | Ph                              | 210        | 97        | 81                          | 97                                           |
| 16 <sup>c</sup> | Ph                                               | Ph                              | 720        | 98        | 85                          | 98                                           |
| 17 <sup>d</sup> | Ph                                               | Ph                              | 120        | >99       | 98                          | >99                                          |
| 18              | <i>n</i> -C <sub>8</sub> H <sub>17</sub>         | Me                              | 120        | 96        | 94                          | 96                                           |
| 19 <sup>d</sup> | <i>n</i> -C <sub>3</sub> H <sub>7</sub>          | Et                              | 120        | 98        | 95                          | 98                                           |
| 20              | <i>n</i> -C <sub>3</sub> H <sub>7</sub>          | Et                              | 60         | 97        | 90                          | 97                                           |
| 21              | allyl                                            | allyl                           | 120        | >99       | 86                          | >99                                          |
| 22 <sup>b</sup> | allyl                                            | allyl                           | 150        | >99       | 94                          | >99                                          |
| 23 <sup>d</sup> | allyl                                            | allyl                           | 90         | 99        | 99                          | 99                                           |
| 24              | HOC <sub>2</sub> H <sub>4</sub>                  | HOC <sub>2</sub> H <sub>4</sub> | 60         | 95        | 99                          | 95                                           |
| 25              | Ph                                               | vinyl                           | 240        | 95        | 86                          | 95                                           |
| 26 <sup>d</sup> | Ph                                               | vinyl                           | 330        | 97        | 95                          | 97                                           |

<sup>a</sup> Reaction conditions: **I** (0.1 mol% relative to substrate and H<sub>2</sub>O<sub>2</sub>), sulfide (1 mmol), 30% aqueous H<sub>2</sub>O<sub>2</sub> (1 mmol), CH<sub>3</sub>CN (6 mL), 293 K. Yield and selectivity were determined by GC and NMR. Remaining H<sub>2</sub>O<sub>2</sub> after reaction was estimated by potential difference titration of Ce<sup>3+</sup>/Ce<sup>4+</sup> (0.1 M of aqueous Ce(NH<sub>4</sub>)<sub>4</sub>(SO<sub>4</sub>)<sub>4</sub>·2H<sub>2</sub>O). Yield (%) = (sulfoxide (mol) + sulfone (mol) × 2)/H<sub>2</sub>O<sub>2</sub> used (mol) × 100. H<sub>2</sub>O<sub>2</sub> efficiency (%) = (sulfoxide (mol) + sulfone (mol) × 2)/consumed H<sub>2</sub>O<sub>2</sub> (mol) × 100. <sup>b</sup> **I** (0.01 mol%), CH<sub>3</sub>CN (1 mL). <sup>c</sup> **I** (0.02 mol%), CH<sub>3</sub>CN (1 mL). <sup>d</sup> 30% aqueous H<sub>2</sub>O<sub>2</sub> (2 mmol), 323 K.

**Table S3** Cartesian coordinates (in Å) of the calculated structures

| atom | x (Å)    | y (Å)    | z (Å)    |
|------|----------|----------|----------|
| O    | -1.18529 | -0.50772 | -0.62061 |
| O    | -3.09479 | 0.564621 | 1.17572  |
| O    | -2.46755 | 1.710327 | -1.40224 |
| O    | -2.43366 | 2.841782 | -0.44725 |
| O    | -0.92539 | 2.291931 | 1.719559 |
| O    | -0.24229 | 0.993698 | 1.678619 |
| O    | 1.317535 | -0.81384 | 0.423508 |
| O    | 3.245773 | 1.009048 | -0.56622 |
| O    | 2.6232   | 0.666016 | 2.23494  |
| O    | 2.606995 | 2.128464 | 2.00177  |
| O    | 1.100357 | 2.795883 | -0.13286 |
| O    | 0.400436 | 1.671921 | -0.76569 |
| O    | 0.569595 | -2.19058 | -1.86636 |
| Se   | 0.059036 | -1.6969  | -0.38524 |
| W    | -1.744   | 1.206207 | 0.332855 |
| W    | 1.899857 | 1.139587 | 0.491348 |
| O    | -0.46275 | -2.87543 | 0.633026 |

Charge = -2;  $E = -1197.99074$  hartree.

**Table S3** (Continued)

**B**

| atom | x (Å)     | y (Å)     | z (Å)     |
|------|-----------|-----------|-----------|
| O    | 0.004868  | -0.087006 | 2.656113  |
| O    | 0.004868  | 2.796204  | 2.656113  |
| O    | -2.523773 | 1.127975  | 2.656113  |
| O    | -2.572662 | 2.189880  | 1.600571  |
| O    | -0.021255 | 1.495209  | 0.181183  |
| O    | 1.104782  | -1.068832 | 0.321472  |
| O    | -0.510773 | -2.079575 | -1.768738 |
| O    | 1.191132  | 0.214996  | -2.098953 |
| O    | -0.123077 | 0.609268  | -2.656128 |
| O    | -2.153442 | 0.062851  | -0.903564 |
| O    | -1.684479 | -0.500168 | 0.369278  |
| O    | 0.377579  | -2.796204 | 2.387146  |
| Se   | 1.062851  | -1.349579 | 2.024643  |
| W    | -0.783691 | 1.527939  | 1.786942  |
| W    | -0.307587 | -0.515839 | -1.085632 |
| O    | 2.572662  | -1.088455 | 2.617554  |

Charge = -2;  $E = -1122.83923274$  hartree.

**Table S3** (Continued)

**TS1**

| atom | x (Å)     | y (Å)     | z (Å)     | displacement vector of the imaginary frequency<br>mode atom |       |       |
|------|-----------|-----------|-----------|-------------------------------------------------------------|-------|-------|
|      |           |           |           | x                                                           | y     | z     |
| O    | 2.410932  | 0.522364  | 0.018467  | -0.05                                                       | -0.01 | 0.05  |
| O    | 1.658988  | 2.786097  | -1.255406 | 0.00                                                        | 0.01  | 0.00  |
| O    | 1.147585  | 2.510844  | 1.555270  | 0.00                                                        | -0.02 | 0.00  |
| O    | -0.118853 | 3.010265  | 0.973979  | 0.01                                                        | -0.01 | 0.00  |
| O    | -0.891264 | 1.640146  | -1.212806 | 0.02                                                        | -0.01 | 0.00  |
| O    | -0.083987 | 0.448653  | -1.517136 | 0.02                                                        | -0.03 | 0.06  |
| O    | 1.166511  | -1.876033 | -0.425450 | 0.00                                                        | 0.05  | 0.04  |
| O    | -1.042322 | -2.722839 | 1.164591  | 0.02                                                        | -0.01 | -0.01 |
| O    | -1.015812 | -2.325989 | -1.721182 | 0.00                                                        | 0.00  | 0.02  |
| O    | -2.255664 | -1.709423 | -1.229990 | -0.01                                                       | 0.01  | 0.03  |
| O    | -0.087400 | 0.014877  | 1.047932  | -0.22                                                       | 0.14  | 0.18  |
| O    | 2.824954  | -1.564681 | 1.819551  | -0.01                                                       | 0.00  | 0.00  |
| Se   | 2.628983  | -1.187023 | 0.231888  | 0.02                                                        | -0.01 | 0.00  |
| W    | 0.775364  | 1.748297  | -0.203852 | 0.01                                                        | 0.02  | -0.01 |
| W    | -0.782226 | -1.457556 | 0.031120  | -0.01                                                       | -0.04 | -0.03 |
| O    | 3.851153  | -1.656266 | -0.764979 | 0.00                                                        | 0.01  | 0.00  |
| O    | -1.930923 | -0.025467 | 0.840844  | 0.81                                                        | 0.06  | 0.11  |
| C    | -3.843077 | 1.728738  | 1.443915  | 0.01                                                        | 0.00  | -0.01 |
| Se   | -3.989254 | 0.162575  | 0.533153  | -0.31                                                       | 0.03  | -0.02 |
| C    | -3.967935 | 0.789275  | -1.174586 | -0.06                                                       | 0.03  | -0.01 |
| H    | -3.859607 | 1.483902  | 2.508123  | -0.01                                                       | 0.00  | 0.00  |
| H    | -4.676188 | 2.396229  | 1.200633  | 0.11                                                        | 0.15  | 0.07  |
| H    | -2.874601 | 2.172858  | 1.197200  | 0.05                                                        | -0.07 | 0.03  |
| H    | -3.951208 | -0.086663 | -1.824516 | -0.09                                                       | 0.04  | -0.02 |
| H    | -3.036972 | 1.344423  | -1.319171 | -0.01                                                       | -0.05 | 0.01  |
| H    | -4.856102 | 1.403556  | -1.360231 | 0.04                                                        | 0.12  | -0.17 |

Charge = -2; E = -1675.9902245 hartree.

**Table S3** (Continued)  
**TS2**

| atom | x (Å)     | y (Å)     | z (Å)     | displacement vector of the imaginary frequency |       |       |
|------|-----------|-----------|-----------|------------------------------------------------|-------|-------|
|      |           |           |           | mode atom                                      |       |       |
|      |           |           |           | x                                              | y     | z     |
| O    | 2.705419  | 0.517712  | -0.269942 | -0.05                                          | -0.01 | 0.05  |
| O    | 1.801397  | 2.438047  | -1.946321 | 0.00                                           | 0.01  | -0.01 |
| O    | 1.439550  | 2.749359  | 0.887151  | 0.00                                           | -0.02 | 0.00  |
| O    | 0.126819  | 3.075674  | 0.284802  | 0.01                                           | -0.01 | 0.00  |
| O    | -0.695502 | 1.243291  | -1.511269 | 0.02                                           | -0.01 | 0.00  |
| O    | 0.150319  | 0.042588  | -1.603332 | 0.02                                           | -0.01 | 0.06  |
| O    | 1.546104  | -1.956460 | -0.072610 | 0.00                                           | 0.06  | 0.03  |
| O    | -0.593413 | -2.489273 | 1.733217  | 0.02                                           | -0.02 | -0.01 |
| O    | -0.647269 | -2.725306 | -1.170312 | 0.00                                           | 0.00  | 0.02  |
| O    | -1.893348 | -2.047391 | -0.791534 | -0.01                                          | 0.01  | 0.04  |
| O    | 0.288995  | 0.176063  | 0.990976  | -0.22                                          | 0.17  | 0.15  |
| O    | 3.271370  | -1.064030 | 1.956594  | -0.01                                          | 0.00  | 0.00  |
| Se   | 3.002446  | -1.084405 | 0.335834  | 0.02                                           | 0.00  | 0.00  |
| W    | 1.016625  | 1.618241  | -0.652945 | 0.00                                           | 0.02  | -0.02 |
| W    | -0.399162 | -1.493951 | 0.347002  | 0.00                                           | -0.05 | -0.02 |
| O    | 4.203836  | -1.737559 | -0.577826 | 0.00                                           | 0.00  | -0.01 |
| O    | -1.559294 | 0.064345  | 0.872738  | 0.83                                           | 0.07  | 0.07  |
| C    | -4.942273 | -1.922755 | -1.967923 | -0.01                                          | -0.01 | -0.02 |
| C    | -5.047575 | -0.659948 | -1.534784 | -0.01                                          | 0.00  | -0.02 |
| C    | -3.868802 | 0.194818  | -1.177430 | -0.05                                          | 0.02  | 0.00  |
| S    | -3.625393 | 0.249857  | 0.661983  | -0.31                                          | 0.05  | 0.00  |
| O    | -3.319045 | 2.058783  | 0.898861  | 0.03                                           | -0.01 | -0.02 |
| O    | -3.197077 | 2.398571  | 2.353656  | 0.01                                           | -0.01 | -0.01 |
| O    | -2.028415 | 2.698629  | 2.932088  | -0.01                                          | 0.01  | 0.02  |
| H    | -5.826658 | -2.510901 | -2.204924 | -0.01                                          | -0.03 | 0.02  |
| H    | -3.968644 | -2.398313 | -2.058534 | -0.01                                          | 0.00  | -0.04 |
| H    | -6.034825 | -0.213156 | -1.401099 | -0.02                                          | -0.03 | 0.03  |
| H    | -4.001420 | 1.230350  | -1.504883 | -0.10                                          | 0.01  | -0.05 |
| H    | -2.933767 | -0.192789 | -1.585344 | -0.05                                          | 0.06  | -0.02 |
| H    | -4.162475 | 2.583350  | 0.432842  | 0.13                                           | 0.15  | -0.02 |
| H    | -2.387871 | 2.267531  | 0.365695  | 0.07                                           | -0.05 | 0.05  |
| H    | -4.115650 | 2.372250  | 2.943194  | 0.00                                           | -0.04 | -0.02 |
| H    | -1.977785 | 2.932808  | 3.993665  | -0.03                                          | 0.00  | 0.02  |
| H    | -1.100818 | 2.698411  | 2.363606  | -0.01                                          | 0.05  | 0.04  |

Charge = -2; E = -1830.786619 hartree.

**Table S3** (Continued)  
**TS3**

| atom | x (Å)      | y (Å)     | z (Å)     | displacement vector of the imaginary frequency |       |       |
|------|------------|-----------|-----------|------------------------------------------------|-------|-------|
|      |            |           |           | mode atom                                      |       |       |
|      |            |           |           | x                                              | y     | z     |
| O    | 3.162309   | 0.489702  | -0.197616 | -0.04                                          | -0.01 | -0.02 |
| O    | 3.629778   | -1.893904 | 1.056583  | 0.00                                           | 0.00  | 0.00  |
| O    | 2.855387   | -1.814118 | -1.712462 | -0.01                                          | 0.01  | 0.00  |
| O    | 2.004031   | -2.854438 | -1.093400 | 0.00                                           | 0.01  | 0.00  |
| O    | 0.821474   | -2.003393 | 1.179673  | 0.01                                           | 0.01  | 0.00  |
| O    | 1.050856   | -0.588073 | 1.506114  | 0.00                                           | 0.01  | -0.04 |
| O    | 1.022151   | 2.056737  | 0.453366  | 0.02                                           | -0.03 | -0.03 |
| O    | -1.512580  | 1.798497  | -0.813851 | 0.02                                           | 0.02  | 0.02  |
| O    | -0.927937  | 1.411030  | 2.012431  | 0.00                                           | 0.00  | -0.02 |
| O    | -1.783406  | 0.291789  | 1.604531  | -0.01                                          | -0.01 | -0.01 |
| O    | -1.032372  | -0.991805 | -0.702853 | 0.68                                           | 0.35  | -0.14 |
| O    | 0.592422   | -0.192548 | -1.008700 | -0.14                                          | -0.17 | -0.14 |
| O    | 2.400407   | 2.524075  | -1.944340 | 0.00                                           | -0.01 | 0.00  |
| Se   | 2.569280   | 2.110179  | -0.364327 | 0.01                                           | 0.01  | 0.00  |
| W    | 2.308406   | -1.354466 | 0.098309  | 0.01                                           | -0.01 | 0.01  |
| W    | -0.539153  | 0.790543  | 0.185350  | -0.02                                          | 0.02  | 0.02  |
| O    | 3.532358   | 3.090976  | 0.536226  | 0.00                                           | 0.00  | 0.00  |
| C    | -2.139250  | -2.221840 | 0.127105  | -0.41                                          | -0.25 | 0.08  |
| C    | -3.090622  | -1.691949 | -0.719873 | -0.10                                          | -0.15 | 0.08  |
| C    | -4.003386  | -0.567651 | -0.365413 | -0.02                                          | -0.03 | 0.00  |
| S    | -5.774978  | -1.157118 | -0.365536 | -0.01                                          | 0.01  | 0.00  |
| C    | -6.615010  | 0.475172  | -0.136945 | -0.01                                          | 0.00  | 0.00  |
| C    | -8.049957  | 0.387385  | -0.554217 | 0.00                                           | 0.01  | 0.00  |
| C    | -9.097307  | 0.544272  | 0.264859  | 0.00                                           | 0.00  | 0.00  |
| H    | -1.581014  | -3.106753 | -0.152969 | 0.00                                           | 0.06  | -0.08 |
| H    | -2.086935  | -1.928802 | 1.170309  | -0.11                                          | -0.03 | 0.00  |
| H    | -3.150704  | -2.069577 | -1.737977 | -0.03                                          | -0.04 | 0.03  |
| H    | -3.934961  | 0.232924  | -1.109779 | 0.03                                           | -0.05 | -0.01 |
| H    | -3.759824  | -0.157983 | 0.616559  | -0.03                                          | -0.02 | 0.00  |
| H    | -6.080581  | 1.197818  | -0.765194 | -0.01                                          | 0.00  | 0.00  |
| H    | -6.526637  | 0.796914  | 0.905484  | -0.01                                          | 0.01  | 0.00  |
| H    | -8.222908  | 0.164235  | -1.607380 | 0.00                                           | 0.00  | 0.00  |
| H    | -10.119472 | 0.468690  | -0.097320 | -0.01                                          | -0.01 | 0.00  |
| H    | -8.963372  | 0.752109  | 1.324426  | 0.00                                           | 0.00  | 0.00  |

Charge = -2; E = -1830.777874 hartree.

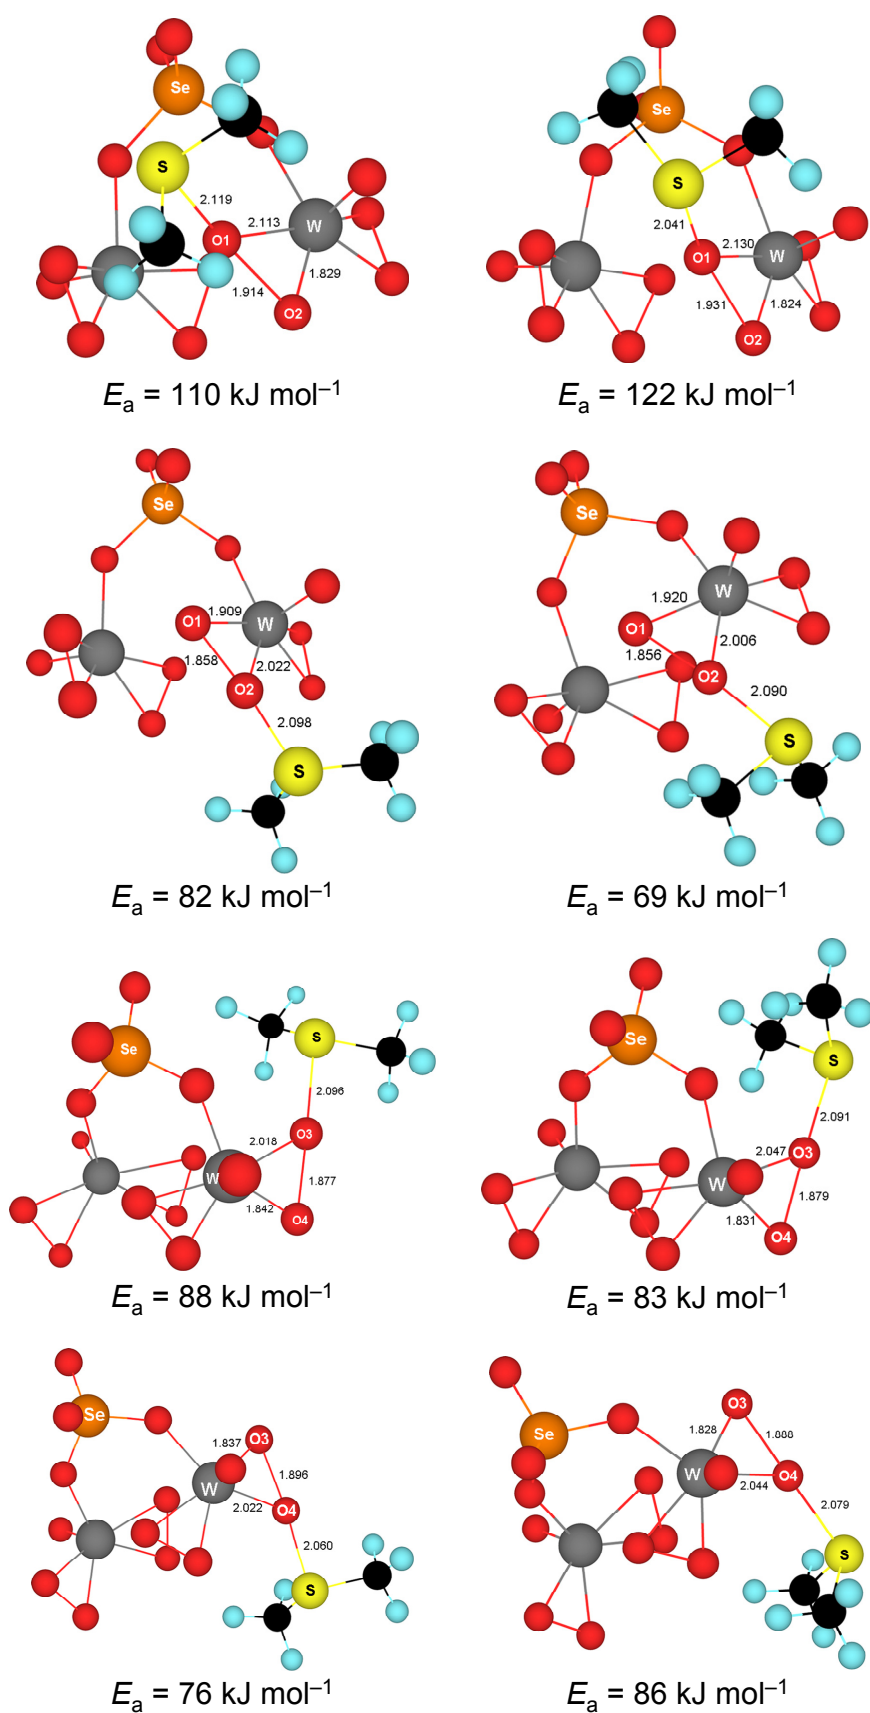

**Figure S1** Transition-state structures and the corresponding activation barriers for the oxidation of dimethyl sulfide (bond lengths in Å). Orange, gray, red, black, and light blue balls represent selenium, tungsten, oxygen, carbon, and hydrogen atoms, respectively.

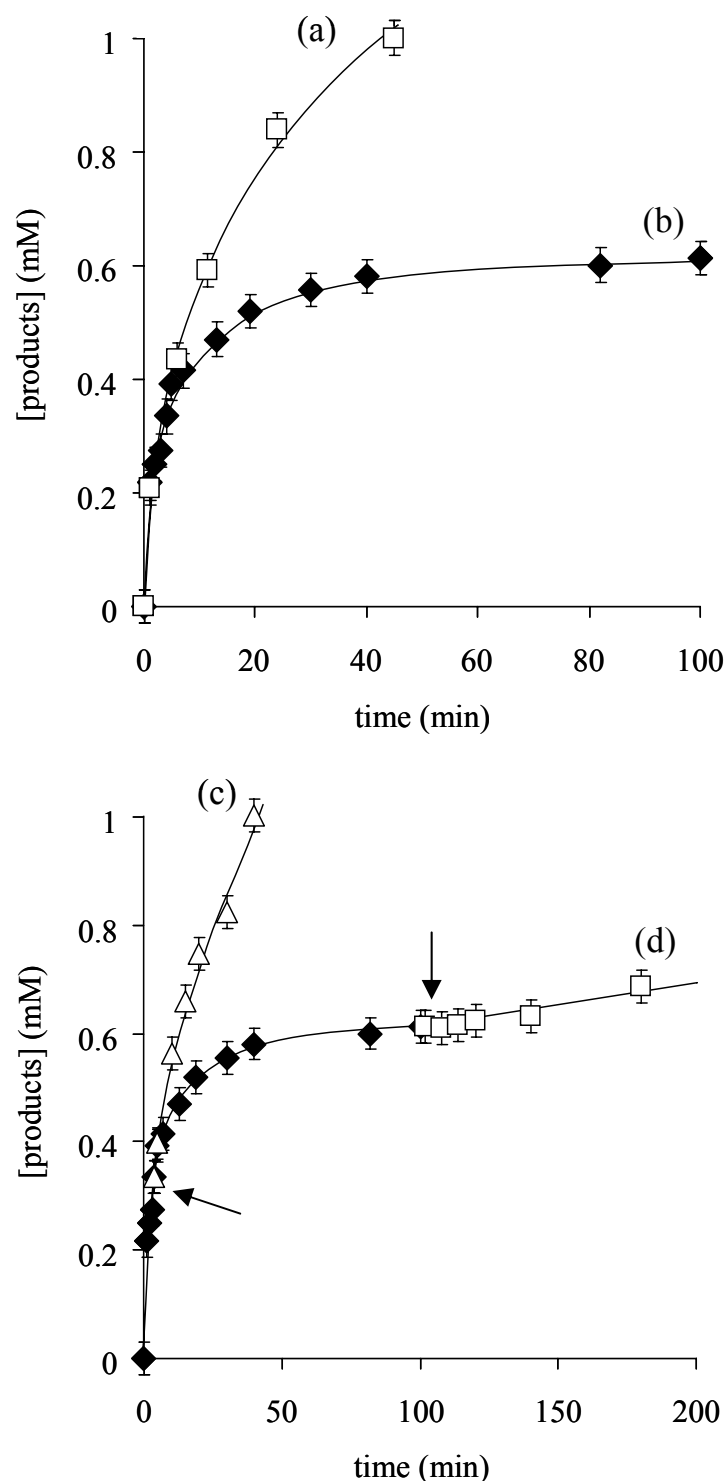

**Figure S2** Reaction profiles for the (a) catalytic and (b, c, and d) stoichiometric oxidation of diphenyl sulfide by **I**. (a) Reaction conditions: **I** (0.31 mM), diphenyl sulfide (3.12 mM), 30% aqueous H<sub>2</sub>O<sub>2</sub> (3.12 mM) CH<sub>3</sub>CN (3.2 mL), 233 K. (b) Reaction conditions: **I** (0.31 mM), diphenyl sulfide (3.12 mM), CH<sub>3</sub>CN (3.2 mL), 233 K. (c) After 4 min (i.e., one equivalent of the active oxygen with respect to **I** was transferred), 30% aqueous H<sub>2</sub>O<sub>2</sub> (3.12 mM) was added as indicated by an arrow. (d) After 100 min (i.e., two equivalents of the active oxygen with respect to **I** were transferred), 30% aqueous H<sub>2</sub>O<sub>2</sub> (3.12 mM) was added as indicated by an arrow. Yield and selectivity were determined by LC. [Products] (mM) = ([sulfoxide] + 2×[sulfone]) (mM).



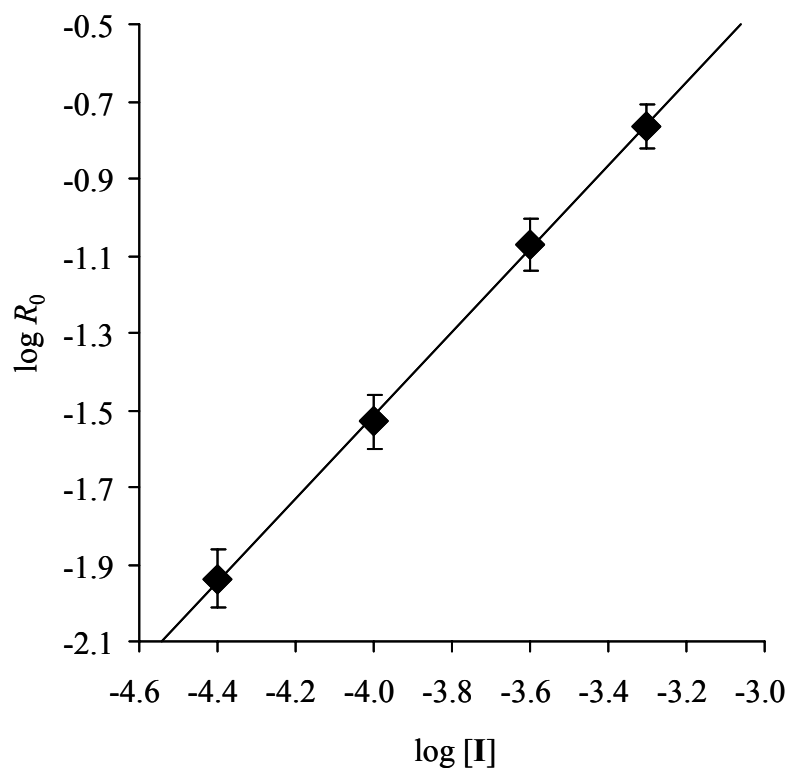

**Figure S3** Dependence of the reaction rate on the concentration of **I**: **I** (0.04–0.50 mM), thioanisole (50 mM), H<sub>2</sub>O<sub>2</sub> (50 mM), H<sub>2</sub>O (250 mM), CH<sub>3</sub>CN (6 mL), 273 K.  $R_0$  values were determined from the reaction profiles at low conversions (<20%) of both thioanisole and H<sub>2</sub>O<sub>2</sub>. Slope = 1.08 ( $R^2 = 0.99$ ).
